# Supplementary material
Source: PubMed Central journal article supplement (PMC7010538)
Supplement: NIHMS1545445-supplement-1.pdf [file NIHMS1545445-supplement-1.pdf]

A.

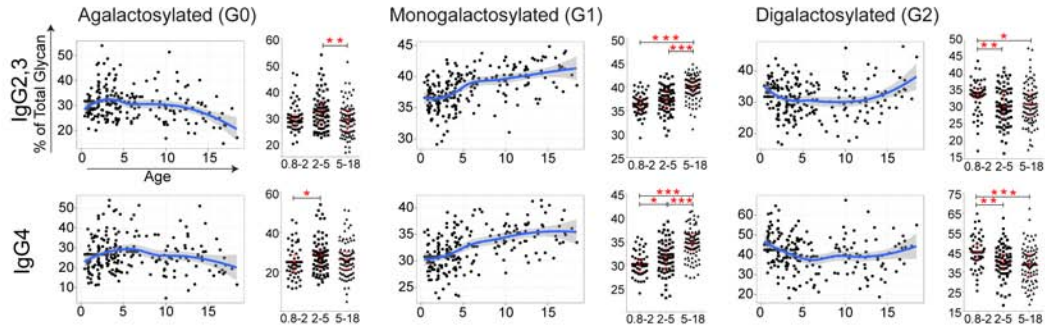

B.

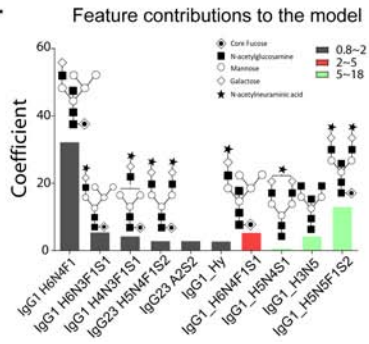

Journal Pre-proof

A.

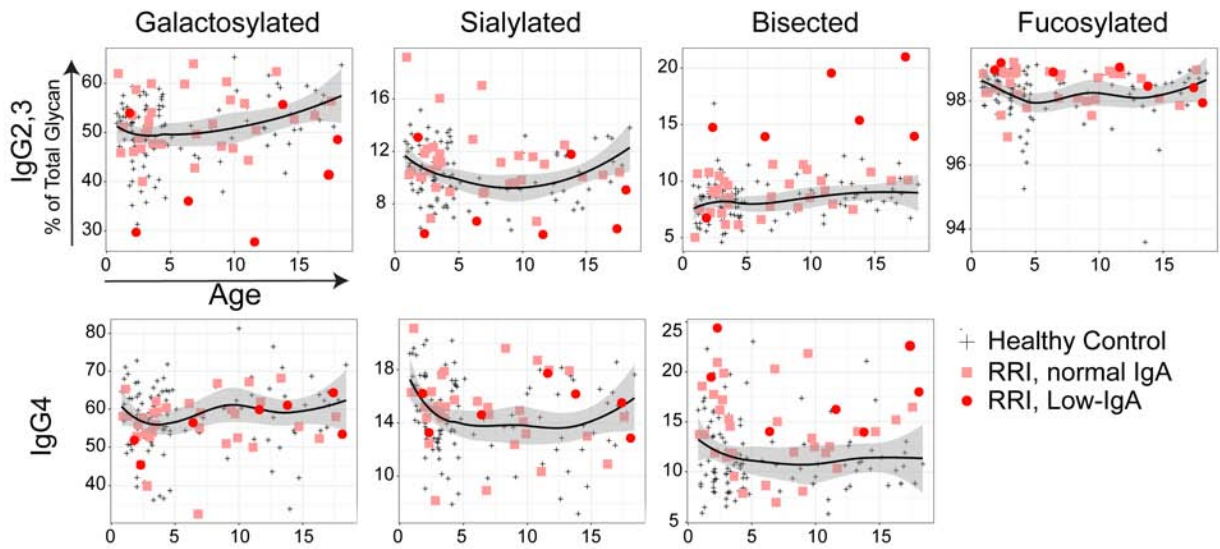

B.

Feature contributions to model

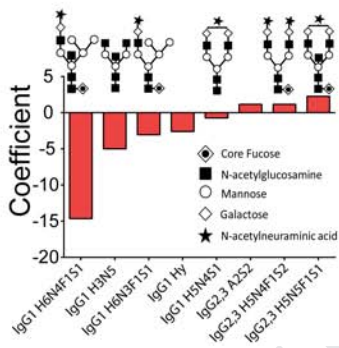

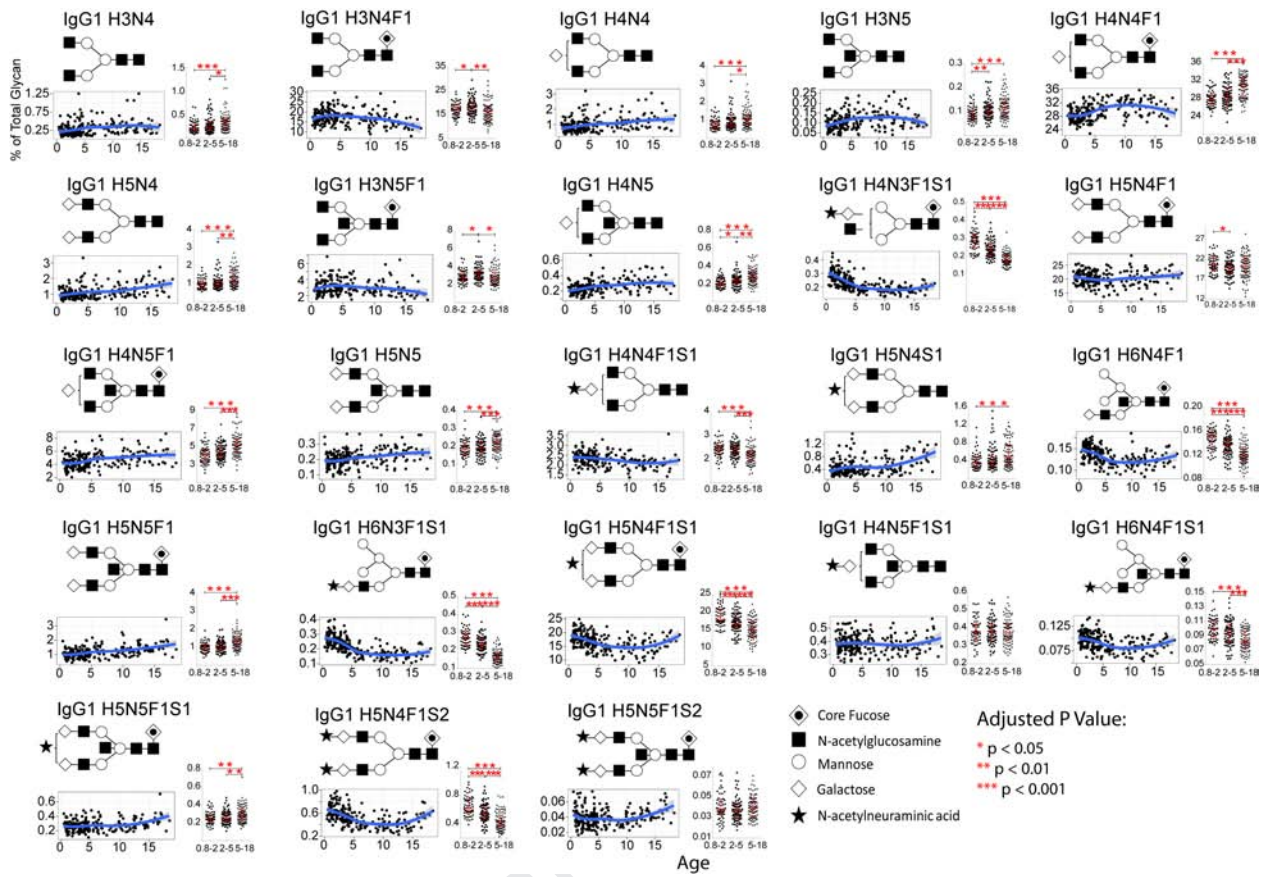

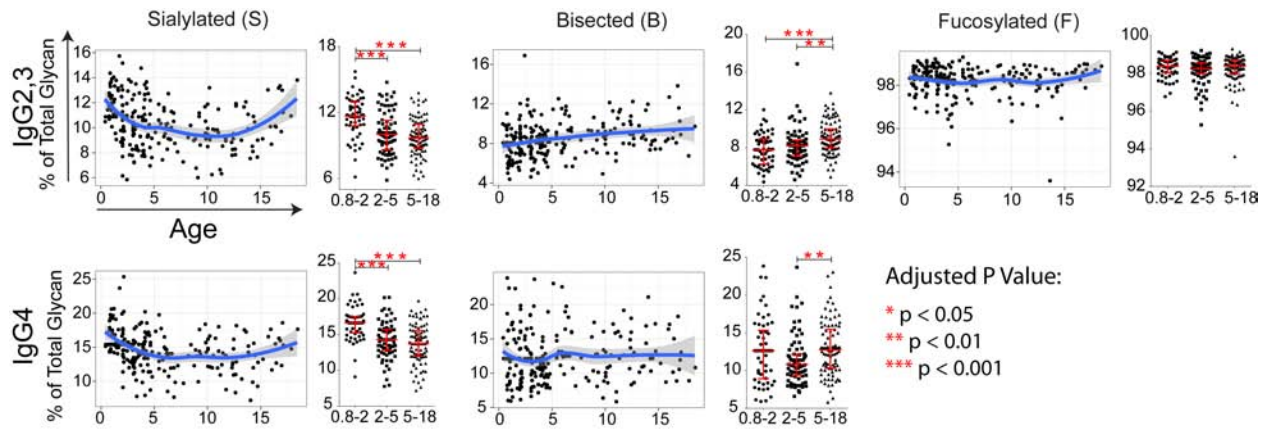

Journal Pre-pro

A.

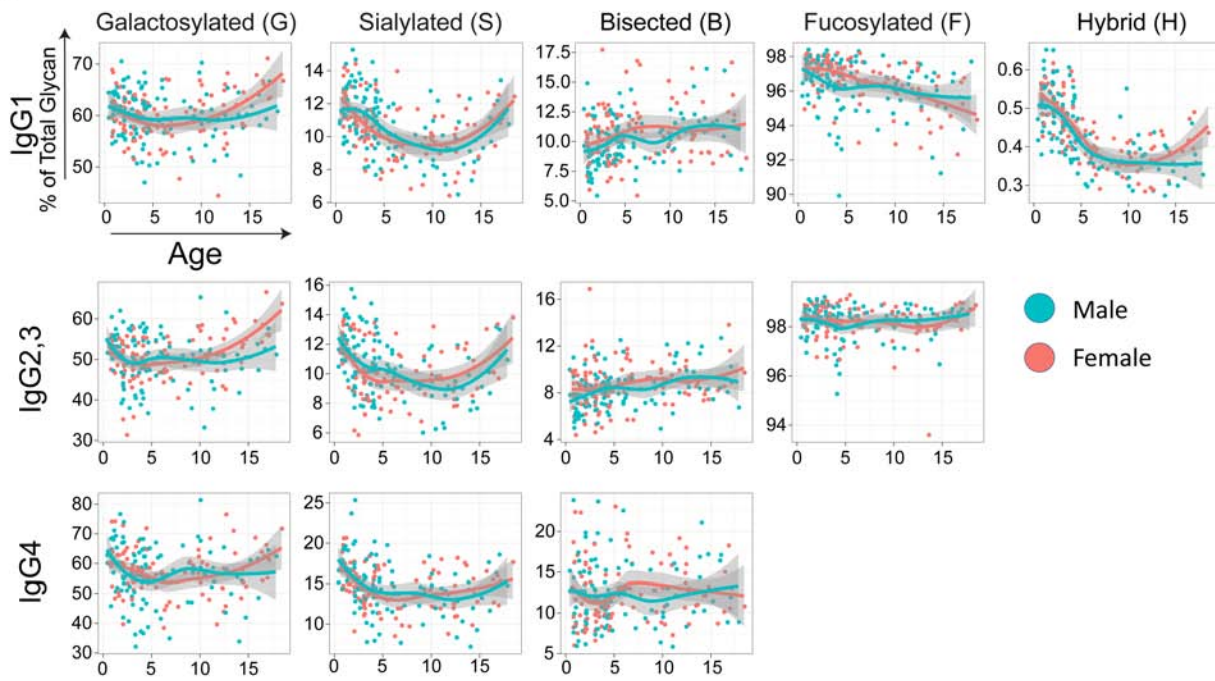

B.

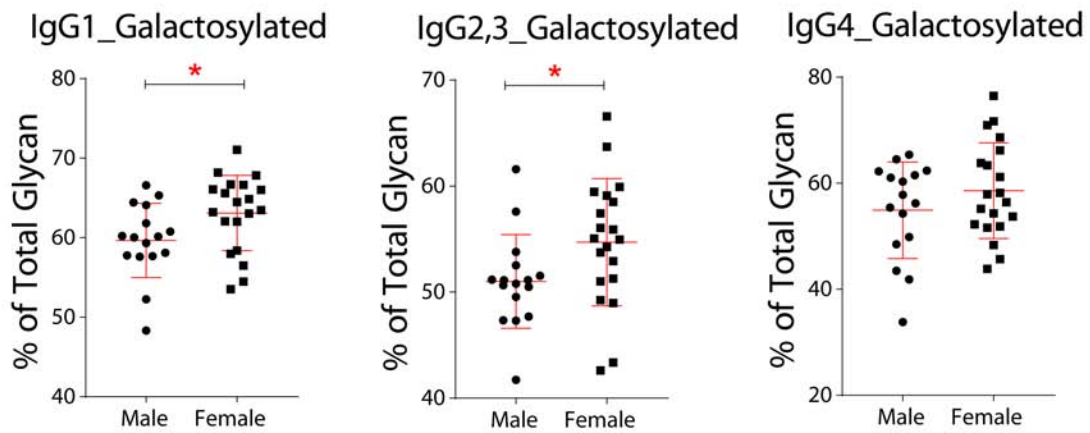

# low IgA vs. healthy glycans

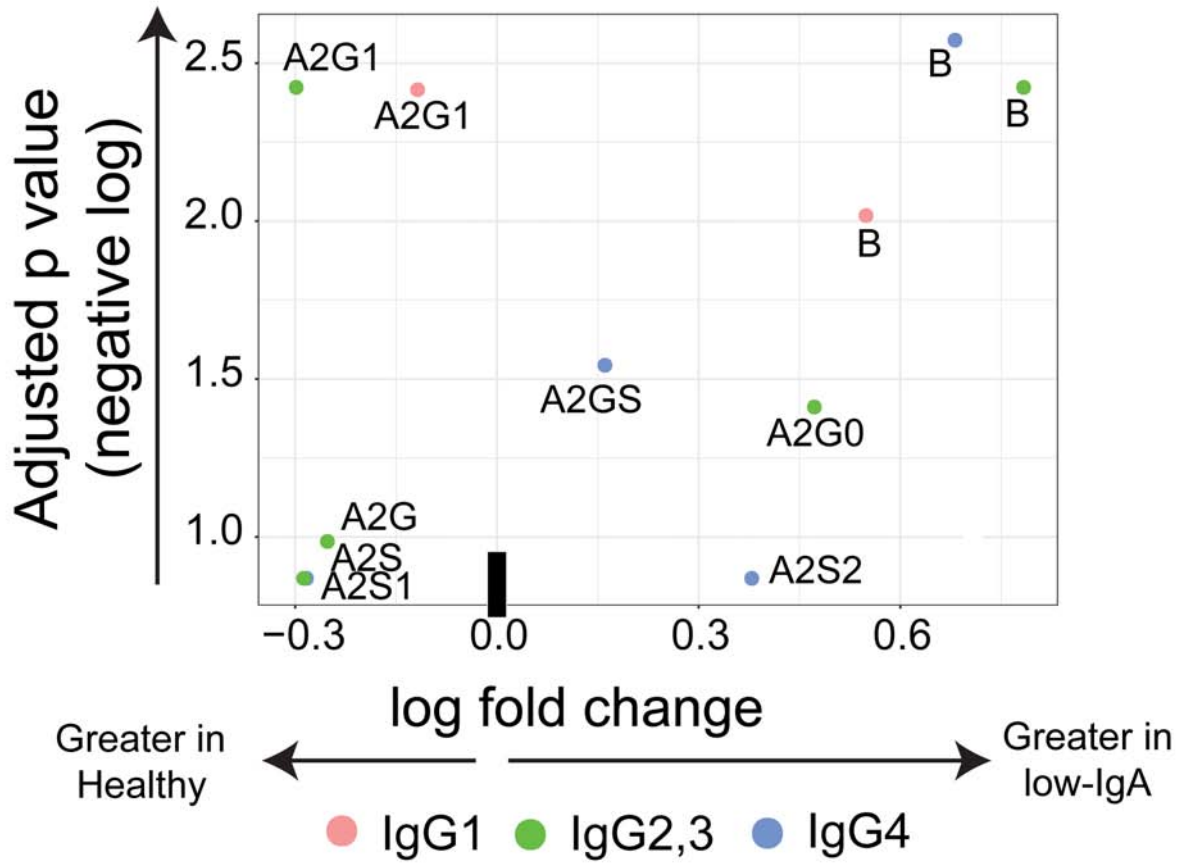

## 70 References

- 71 1. Ercan A, Barnes MG, Hazen M, Tory H, Henderson L, Dedeoglu F, et al. Multiple juvenile  
72 idiopathic arthritis subtypes demonstrate pro-inflammatory IgG glycosylation. *Arthritis Rheum.*  
73 2012;64(9):3025-33.
- 74 2. Driessen GJ, Dalm VA, van Hagen PM, Grashoff HA, Hartwig NG, van Rossum AM, et al. Common  
75 variable immunodeficiency and idiopathic primary hypogammaglobulinemia: two different conditions  
76 within the same disease spectrum. *Haematologica.* 2013;98(10):1617-23.
- 77 3. de Haan N, Reiding KR, Driessen G, van der Burg M, Wuhrer M. Changes in Healthy Human IgG  
78 Fc-Glycosylation after Birth and during Early Childhood. *J Proteome Res.* 2016;15(6):1853-61.
- 79 4. Falck D, Jansen BC, de Haan N, Wuhrer M. High-Throughput Analysis of IgG Fc Glycopeptides by  
80 LC-MS. *Methods in molecular biology (Clifton, NJ).* 2017;1503:31-47.
- 81 5. Jansen BC, Falck D, de Haan N, Hipgrave Ederveen AL, Razdorov G, Lauc G, et al. LaCyTools: A  
82 Targeted Liquid Chromatography-Mass Spectrometry Data Processing Package for Relative Quantitation  
83 of Glycopeptides. *J Proteome Res.* 2016;15(7):2198-210.
- 84 6. Stockmann H, Duke RM, Millan Martin S, Rudd PM. Ultrahigh throughput, ultrafiltration-based  
85 n-glycomics platform for ultraperformance liquid chromatography (ULTRA(3)). *Anal Chem.*  
86 2015;87(16):8316-22.
- 87 7. Stockmann H, Adamczyk B, Hayes J, Rudd PM. Automated, high-throughput IgG-antibody  
88 glycoprofiling platform. *Anal Chem.* 2013;85(18):8841-9.
- 89 8. Boesch AW, Brown EP, Cheng HD, Ofori MO, Normandin E, Nigrovic PA, et al. Highly parallel  
90 characterization of IgG Fc binding interactions. *mAbs.* 2014;6(4):915-27.
- 91 9. Brown EP, Licht AF, Dugast AS, Choi I, Bailey-Kellogg C, Alter G, et al. High-throughput,  
92 multiplexed IgG subclassing of antigen-specific antibodies from clinical samples. *Journal of*  
93 *immunological methods.* 2012;386(1-2):117-23.
- 94 10. Benjamini Y, Hochberg Y. Controlling the False Discovery Rate: A Practical and Powerful  
95 Approach to Multiple Testing. *Journal of the Royal Statistical Society Series B (Methodological).*  
96 1995;57(1):289-300.
- 97 11. Friedman J, Hastie T, Tibshirani R. Regularization Paths for Generalized Linear Models via  
98 Coordinate Descent. *Journal of statistical software.* 2010;33(1):1-22.

**Table E1. Recurrent respiratory infection subjects**

| Age (y) | M/F | Infections                               | WBC<br>Kcells/ul | ALC<br>Kcells/ul | IgG<br>mg/dl | IgA<br>mg/dl | IgM<br>mg/dl | IgE<br>unit/ml | IgG<br>subclasses | IgG1<br>mg/dl | IgG2<br>mg/dl | IgG3<br>mg/dl | IgG4<br>mg/dl | Pneumoco<br>cal titer | CH50<br>(60-144) |
|---------|-----|------------------------------------------|------------------|------------------|--------------|--------------|--------------|----------------|-------------------|---------------|---------------|---------------|---------------|-----------------------|------------------|
| 0.9     | M   | rec otitis                               | 14.89            | 8.79             | 512          | 67           | 74           | 1              | Low IgG4          | 330           | 70            | 114 H         | <1 L          | Good                  | Normal           |
| 1.0     | M   | rec sinusitis                            | 7.25             | 5.18             | 469          | 36           | 59           |                | Low IgG4          | 322           | 53            | 74            | <1 L          | Good                  | Not done         |
| 1.1     | M   | rec otitis, rec sinusitis                | 8.28             | 4.65             | 390          | 47           | 76           | 26             | Normal            | 256           | 52            | 26            | 2             | Not done              | Normal           |
| 1.8     | M   | rec otitis                               | 11.41            | 3.65             | 481          | 66           | 87           |                | Low IgG4          | 295           | 113           | 85            | <1L           | Good                  | 156H             |
| 2.1     | M   | rec otitis, rec pneumonia, rec sinusitis | 7.73             | 3.32             | 617          | 79           | 46           | 14             | Normal            | 392           | 99            | 30            | 2             | Good                  | 57L              |
| 2.3     | F   | rec ear otitis, rec pneumonia            | 10.14            | 4.85             | 649          | 65           | 88           | 18             | Normal            | 412           | 81            | 42            | 7             | Good                  | Not done         |
| 2.6     | F   | rec otitis, rec pneumonia                | 18.59            | 8.88             | 468          | 41           | 64           | 4              | Normal            | 340           | 63            | 35            | 2             | Good                  | Not done         |
| 2.6     | F   | rec otitis, rec pneumonia                | 17.35            | 8.88             | 527          | 63           | 57           | 4              | Normal            | 363           | 56            | 27            | 6             | Good                  | Not done         |
| 2.8     | M   | rec otitis                               | 5.27             | 1.94             | 665          | 81           | 37           | 52             | Normal            | 459           | 51            | 22            | 14            | Low                   | Not done         |
| 3.0     | M   | rec sinusitis                            | 8.44             | 6.08             | 746          | 180          | 48           | 12             | High IgG3         | 516           | 134           | 83H           | 17            | Good                  | Normal           |
| 3.1     | M   | rec pneumonia                            | 13.19            | 4.91             | 733          | 61           | 82           | 13             | Normal            | 509           | 83            | 24            | 2             | Good                  | Not done         |
| 3.2     | M   | rec otitis                               | 9.86             | 4.28             | 567          | 49           | 52           | 21             | Normal            | 377           | 89            | 36            | 4             | Good                  | Normal           |
| 3.4     | M   | rec otitis                               | 9.84             | 4.1              | 881          | 110          | 107          | 6              | Normal            | 525           | 114           | 61            | 9             | Not done              | Not done         |
| 3.6     | M   | rec sinusitis                            | 9.23             | 4.85             | 1171         | 78           | 89           | 3              | High IgG3         | 762           | 133           | 130H          | 24            | Good                  | Not done         |
| 4.3     | F   | rec otitis, rec pneumonia                | 5.58             | 2.42             | 848          | 75           | 108          | 153            | Normal            | 573           | 159           | 44            | 1             | Good                  | Not done         |
| 4.3     | M   | rec otitis                               |                  |                  | 680          | 91           | 54           | 14             | Normal            | 441           | 88            | 33            | 8             | Good                  | Not done         |
| 4.3     | M   | rec otitis, rec pneumonia                | 5.85             | 2.52             | 1188         | 172          | 147          | 76             | High IgG4         | 720           | 207           | 43            | 125H          | Good                  | Normal           |
| 5.5     | M   | rec otitis, rec pneumonia, rec sinusitis | 6.11             | 3.2              | 898          | 79           | 60           | 9              | Normal            | 575           | 215           | 22            | 36            | Good                  | Not done         |
| 5.9     | M   | rec pneumonia                            | 6.3              | 2.86             | 705          | 125          | 69           | 108            | Normal            | 384           | 205           | 27            | 7             | Good                  | Not done         |
| 6.0     | F   | rec sinusitis                            | 5.61             | 2.7              | 1142         | 132          | 153          | 145            | Normal            | 705           | 302           | 47            | 30            | Good                  | Normal           |
| 6.1     | F   | rec pneumonia                            | 10.47            | 4.46             | 791          | 124          | 96           | 715 H          | Normal            | 422           | 272           | 81            | 64            | Good                  | Normal           |
| 6.8     | M   | rec otitis                               | 6.71             | 3.03             | 675          | 186          | 61           | 90             | Normal            | 357           | 212           | 64            | 96            | Not done              | Not done         |
| 7.0     | F   | rec otitis                               | 6.43             | 3.57             | 667          | 82           | 110          | 21             | Normal            | 462           | 107           | 44            | 13            | Good                  | Not done         |
| 9.1     | M   | rec sinusitis, rec pneumonia             | 9.58             | 2.32             | 779          | 91           | 57           | 42             | Normal            | 429           | 196           | 68            | 70            | Low                   | Normal           |
| 9.5     | M   | rec otitis, rec pneumonia, rec sinusitis | 5.33             | 2.14             | 764          | 112          | 87           | 25             | Normal            | 519           | 143           | 33            | 11            | Good                  | Normal           |
| 9.5     | M   | rec sinusitis                            | 9.7              | 2.84             | 927          | 96           | 119          | 11             | Normal            | 482           | 236           | 156           | 34            | Good                  | Normal           |
| 10.0    | F   | rec sinusitis                            | 7.89             | 2.35             | 1,139        | 128          | 166          | 51             | High IgG3         | 700           | 277           | 131H          | 17            | Good                  | Normal           |
| 10.7    | M   | rec sinusitis                            | 7.34             | 3.54             | 711          | 154          | 113          | 125            | Normal            | 401           | 212           | 67            | 10            | Good                  | Normal           |
| 11.1    | M   | rec otitis, rec sinusitis                | 6.51             | 1.17             | 1023         | 306          | 99           | 145            | Normal            | 477           | 357           | 72            | 26            | Good                  | Normal           |
| 13.2    | M   | rec pneumonia, rec sinusitis             |                  |                  | 866          |              |              | 9              | Normal            | 386           | 282           | 76            | 11            | Good                  | Not done         |
| 14.7    | F   | rec otitis                               | 6.92             | 2.41             | 857          | 64           | 246          | 13             | Normal            | 496           | 178           | 42            | 12            | Not done              | 56L              |
| 16.3    | M   | rec sinusitis                            | 6.97             | 2.12             | 1104         | 149          | 173          | 311H           | High IgG4         | 640           | 256           | 80            | 111H          | Good                  | Normal           |
| 17.7    | M   | rec sinusitis, rec pneumonia             | 5.7              | 1.77             | 965          | 149          | 88           | 317H           | Normal            | 534           | 264           | 24            | 13            | Good                  | Not done         |



**Table E2. Low IgA subjects**

| Subject                   | 1          | 2          | 3          | 4                         | 5                                        | 6             | 7             |
|---------------------------|------------|------------|------------|---------------------------|------------------------------------------|---------------|---------------|
| <b>Age</b>                | 1.7        | 2.2        | 6.3        | 9.8                       | 11.5                                     | 13.7          | 17.3          |
| <b>M/F</b>                | M          | F          | F          | F                         | M                                        | F             | F             |
| <b>Infections</b>         | rec otitis | rec otitis | rec otitis | rec otitis, rec sinusitis | rec otitis, rec pneumonia, rec sinusitis | rec sinusitis | rec sinusitis |
| <b>WBC Kcells/ul</b>      | 11.52      | 6.56       | 9.9        | 6.94                      | 5.35                                     | 5.6           | 6.3           |
| <b>ALC Kcells/ul</b>      | 4.69       | 3.74       | 4.67       | 3.29                      | 1.69                                     | 2.39          | 1.97          |
| <b>IgG mg/dl</b>          | 432        | 524        | 1096       | 894                       | 1115                                     | 693           | 1204          |
| <b>IgA mg/dl</b>          | 13         | 10         | <7         | 54                        | <7                                       | 53            | <7            |
| <b>IgM mg/dl</b>          | Not done   | 64         | 130        | 164                       | 185                                      | 114           | 131           |
| <b>IgE unit/ml</b>        | 56H        | Not done   | 42         | 30                        | 49                                       | 3             | 4             |
| <b>IgG subclasses</b>     | Normal     | Normal     | Normal     | Normal                    | Normal                                   | Normal        | Normal        |
| <b>IgG1 mg/dl</b>         | 309        | 367        | 633        | 532                       | 650                                      | 385           | 745           |
| <b>IgG2 mg/dl</b>         | 52         | 74         | 367        | 259                       | 369                                      | 209           | 354           |
| <b>IgG3 mg/dl</b>         | 42         | 16         | 24         | 78                        | 35                                       | 35            | 37            |
| <b>IgG4 mg/dl</b>         | 1          | 1          | 8          | 31                        | 12                                       | 40            | 10            |
| <b>Pneumococcal titer</b> | Low        | Good       | Good       | Good                      | Good                                     | Good          | Good          |
| <b>CH50 (60-144)</b>      | 45L        | Not done   | Not done   | Not done                  | Not done                                 | Normal        | Not done      |

103

104 **Figure E1. IgG2,3 and Ig4 Fc glycans in healthy children.** (A) Levels of galactosylated IgG2,3 and IgG4  
105 glycans in 145 healthy children, as defined by LC-ESI-MS, plotted by age. (B) Glycan feature contributions  
106 to the age category classification model, colored by respective contribution to each age group. P values  
107 (adjusted in A for multiple comparisons): \* <0.05, \*\*<0.01, \*\*\*, <0.001

108 **Figure E2. IgG2,3 and IgG4 Fc glycans in healthy children and immunodeficient subjects.** (A)  
109 Scatterplots of galactosylated, sialylated, bisected, fucosylated and hybrid glycans by age in IgG2,3 and  
110 Ig4 from healthy children (black LOESS line, 95% confidence interval indicated in gray), RRI with normal  
111 IgA, and RRI with low IgA. (B) Glycan feature contributions to the RRI vs. HC classification model

112 **Figure E3. Individual IgG1 Fc glycans in healthy children.** Levels of individual IgG1 Fc glycans in 145  
113 healthy children, as defined by LC-ESI-MS, plotted by age. (Left) Scatterplots of glycan prevalence versus  
114 age (black LOESS line, 95% confidence interval indicated in gray). P values adjusted for multiple  
115 comparisons: \* <0.05, \*\* <0.01, \*\*\* < 0.001.

116 **Figure E4. Summary IgG2,3 and IgG4 Fc glycans in healthy children.** Level of sialylated, bisected, and  
117 fucosylated IgG2,3 and IgG4 Fc glycans in 145 healthy children, as defined by LC-ESI-MS, plotted by age  
118 (black LOESS line, 95% confidence interval indicated in gray). P values adjusted for multiple comparisons:  
119 \* <0.05, \*\* <0.01, \*\*\* < 0.001

120 **Figure E5. Summary IgG Fc glycans in healthy male versus female children.** A. Levels of summary IgG1  
121 (top), IgG2,3 (middle), and IgG4 (bottom) glycans including galactosylated, sialylated, bisected,  
122 fucosylated and hybrid species in healthy male (blue) and female (red) children, as defined by LC-ESI MS,  
123 plotted by age. (black LOESS line, 95% confidence interval indicated in gray) B. IgG Galactosylation in age  
124 12 or older in males n=16 vs. females n=20, mean +/- SD IgG1 60.0+/-4.7% vs. 63.1+/-4.7%, p=0.035;  
125 IgG2/3 51.0+/-4.1% vs. 54.7+/-6.0%, p=0.047, IgG4 54.9+/-9.1% vs. 58.6+/-9.0%, p=0.24.

126 **Figure E6. Comparison of IgG Fc glycans in healthy children versus IgA low children.** Volcano plot  
127 depicting differences between healthy and RRI subjects with low-IgA. A2=biantennary, G =  
128 galactosylation (0, 1 or 2), S=sialylated (0, 1 or 2), B=bisected, Hy=hybrid.

129
